# Supplementary material for: Deficiencies of effectiveness of intervention studies in veterinary medicine: a cross-sectional survey of ten leading veterinary and medical journals
Source: PeerJ journal article supplement (doi:10.7717/peerj.1649), 2016-01-28
Supplement: Supplementary_information.pdf [file Supplementary_information.pdf]

# 1 **Supplementary Note 1**

## 2 **Details on pilot study, sample size calculation and eligibility** 3 **criteria for journal inclusion**

### 4 ***Sample size***

5 A pilot study on a different dataset was performed to assess the prevalence of  
6 RCTs over the total number of articles describing effectiveness of interventions in  
7 veterinary medicine and general medicine. All articles that were published in the first  
8 6 months of 2006 in one veterinary journal (JAVMA) and one medical journal  
9 (JAMA) were assessed for RCT prevalence. A prevalence of 69,1% (29 RCTs/42  
10 intervention articles) and 29,7% (8 RCTs/27 intervention articles) was identified for  
11 JAMA and JAVMA respectively. Using a formula for two proportions and equal  
12 group size [1] a minimal sample of 45 articles per group was required to have 90%  
13 power to detect a difference at a statistical significance of 1%.

14 We estimated how many journals we had to search and for which time span  
15 based on pertinent research data from a study by Giuffrida et al. [2]. This study  
16 identified 47 RCTs during a time period of 5 years in 2 of the veterinary journals  
17 included in the present survey, i.e., a mean of 4.7 RCTs per-journal per-year. Based  
18 on our pilot study we expected to find roughly one RCT per 3 EoI articles and that  
19 each journal should have published approximately 15 EoI articles per-year. Therefore,  
20 hand-searching 3 journals for each specialty (i.e., veterinary medicine and general  
21 medicine) for one year would be sufficient to obtain the required sample size.  
22 Considering a worst-case scenario, we included 5 journals per-discipline (i.e., a total  
23 of 10 journals).

24

25 **Criteria for journal inclusion**

26 To be eligible for inclusion in the study the journals must be in English, must have a  
27 broad scope (i.e., general and internal medicine) and must have been relevant in the  
28 field for a certain period.

29 The “VETERINARY SCIENCES” category of the 2013 ISI Journal Citation  
30 Report was sorted by decreasing impact factor. All the journals that focused on sub-  
31 specialties (e.g., Veterinary Microbiology, Veterinary Parasitology, etc.) or in non-  
32 English language were excluded. To endorse historical journals, all the journals that in  
33 the year 2000 were not published or had an impact factor lower than 1.0 were  
34 excluded. Aims and scopes of the remaining journals were evaluated on their websites  
35 until the first 5 journals presenting broad scope were identified: ‘*Veterinary Journal*’;  
36 ‘*Veterinary Record*’; ‘*Journal of Veterinary Internal Medicine*’; ‘*Journal of the*  
37 ‘*American Veterinary Medical Association*’; ‘*American Journal of Veterinary*  
38 ‘*Research*’.

39 In a similar fashion, 5 leading general medical journals were included. The  
40 category “MEDICINE, GENERAL AND INTERNAL” of the 2013 ISI Journal  
41 Citation Report was sorted by impact factor. All the journals that focused on a sub-  
42 specialty were excluded. The scope of the remaining journals was evaluated on their  
43 websites until 5 journals presenting broad scope published at least since 2000 were  
44 identified. The 5 medical journals included in the study were: ‘*New England Journal*  
45 ‘*of Medicine*’; ‘*the Lancet*’; ‘*Journal of the American Medical Association*’; ‘*British*  
46 ‘*Medical Journal*’; ‘*Annals of Internal Medicine*’ (Table 1).

47

48

## 49 **Supplementary Note 2**

### 50 **Additional details on data extraction**

51

52 The following data items were recorded during the data extraction procedures.

#### 53 *Number of full original articles*

54 The total number of full original articles was recorded because in previous studies in  
55 other specialties [3,4] the prevalence of RCTs was provided as: RCTs/All published  
56 articles.

57 Reports eligible as full original articles: primary research, including subgroup  
58 analysis or follow-up of previous articles; case series, defined as original reports  
59 including more than one patient.

60 Reports not eligible as full original articles: Single case reports; Secondary  
61 research, including systematic reviews and non-systematic reviews; Qualitative  
62 studies, letters, point of view, commentaries, clinical queries, i.e., all articles without  
63 the original research format (i.e., Introduction-Materials and Methods-Results-  
64 Discussion); Mathematical modelling of pre-published database.

65

#### 66 *Number of articles evaluating effectiveness of interventions (EoI)*

67 “*Effectiveness*” was defined as “*evaluation of benefits*” of an intervention.

68 “*Interventions*” were defined as “*act used to improve health, to treat a particular*  
69 *condition or disease in process or to prevent development of a particular condition or*  
70 *disease*” [5,6]. For the purpose of this review, legislation changes and taxes were not  
71 considered interventions. Exclusively *in vitro* studies were not included in this  
72 category.

73           Reports eligible as EoI articles: Case series, case-control studies, cohort  
74 studies, analytical cross-sectional studies, non-randomised controlled trials, and RCTs  
75 were included in this category if evaluated the desired effect of an intervention *in*  
76 *vivo*.

77           Reports not eligible as EoI articles: (1) reports focusing solely on undesired  
78 and adverse effects of the intervention, e.g., studies of hemodynamic changes after  
79 administration of an anaesthetic intervention; (2) reports focusing on an outcome that  
80 is the measurement of the intervention itself, e.g., pharmacokinetic and  
81 pharmacodynamics studies, studies of hormonal stimulation for diagnostic tests.  
82 Instead, studies evaluating changes in outcome that may have a direct clinical  
83 significance (e.g., increase in vitamin D levels after exposure to UVB light; decrease  
84 in white blood cells after an antimicrobial treatment, etc.) were considered EoI  
85 articles; (3) reports of accuracy of a diagnostic technique (i.e., sensitivity and  
86 specificity or mean difference). Instead, articles evaluating the effect of a diagnostic  
87 technique on clinically important outcomes for the patient were considered EoI  
88 articles.

89

#### 90 *Number of EoI articles that described surgical interventions*

91           The type of intervention was categorised in surgical/non-surgical, as  
92 researches of surgical interventions face different challenges regarding several  
93 aspects, including study design [7]. EoI articles were considered “surgical” when (1)  
94 the intervention required cutting of the skin. Needle-related procedures (e.g.,  
95 amniocentesis, etc.) were not considered surgical procedures; (2) the difference  
96 between the control and the experimental group was in the presence, type or technique  
97 of the surgical procedure. If the difference between the control and the experimental

98 group was a medication given after/before a surgical procedure the trial was not  
99 considered surgical.

100

#### 101 *Number of RCTs*

102 Studies were defined RCTs based on the US National Library of Medicine  
103 2008 definitions for the Publication Type terms ‘Randomised Controlled Trial’ and  
104 based on the definition of the Cochrane glossary [8]. All the reports with allocation to  
105 interventions described as randomised were included [9]. A study was classified as “a  
106 RCT” when (1) at least two interventions were compared; (2) and randomisation was  
107 mentioned.

108 Studies based on RCTs that are not the primary outcomes of RCTs, subgroup  
109 analyses or long-term outcome of previously published RCTs were also considered  
110 RCTs if randomisation was maintained. Articles were included when they reported on  
111 “randomly” allocated interventions, even when their actual allocation was  
112 “nonrandom” (e.g., alternation, date of admission, etc.). Crossover studies (including  
113 Latin square design studies) were considered RCTs if the patients were randomly  
114 assigned to the treatment groups. If the word “random”, “randomly”, “randomised” or  
115 “randomised” was not used to describe allocation of the patients to the treatment, the  
116 study was not considered a RCT.

117

#### 118 *Number of RCTs that included real patients*

119 We evaluated if RCTs involved real clinical patients or non-patients, i.e.,  
120 voluntary individuals or experimental animals. Real clinical patients were defined as  
121 “*the population that presents the condition that needs to be treated or prevented and*  
122 *that will benefit of the intervention once established*”. Articles were considered to

123 include real clinical patients when these individuals or animals: (1) suffered from a  
124 spontaneous disease; and (2) were exposed to real-life conditions. Only animals kept  
125 in their usual environment and owned by their usual personnel were eligible for  
126 inclusion in this category. For example pet animals owned by private individuals and  
127 farm animals owned by farmers are considered real clinical patients. Shelter animals  
128 are considered real clinical patients only in case an intervention is specifically  
129 directed to treat a condition that occurs in shelters.

130 Non-patients refer to: (1) Animals suffering from induced diseases; (2)  
131 Animals maintained in laboratory conditions (except when the laboratory animal is  
132 the final beneficiary of the intervention); (3) Healthy individuals or animals, except  
133 when an intervention is specifically planned for healthy individuals or animals, e.g.,  
134 the use of a particular diet, neutering of pets, etc.

135

### 136 *Assessment of reporting of key methodological domains in RCTs*

137 The following protocol was applied for the assessment of reporting key  
138 methodological domains in RCTs. Two operators (ND, LNPC) independently  
139 assessed the RCTs. In case of disagreement, an arbiter was consulted (RMR). Firstly,  
140 the *materials and methods* section was thoroughly read and relevant information was  
141 highlighted. Then, key words were searched using the search function of Portable  
142 Document Formats (PDF)s to find additional information that was not reported in the  
143 *materials and methods* section. The search words included: “power”, “sample” and  
144 “size” for power calculation; “primary”, “main”, “outcome” and “endpoint” for  
145 primary outcome; “random”, “allocat” for randomisation and allocation concealment;  
146 “blind”, “mask”, “aware”, “know”, “inform” for blinding domains; “95”, “CI” and  
147 “interval” for effect size estimation; “intent”, “analysis” and “attrition” for handling

148 of attrition. To avoid inappropriate exclusion of pertinent items, all grammatical  
149 derivatives of these search terms were applied during these searches. Finally, each  
150 methodological domain was scored “yes” if adequately reported, or “no” if not  
151 adequately reported.

152 *Evaluation of additional data than the published article* – To avoid  
153 inappropriate exclusion of eligible articles, full-texts of protocols, supplements, and  
154 previous or accompanying manuscripts, which were explicitly mentioned in the main  
155 text were also assessed. In the case that no references to supplementary material were  
156 present in the main text, only the published report was assessed.

157

158 *Key methodological domains*

159 We evaluated the following key methodological domains [10]:

160 *Primary outcome*- Authors explicitly reported a primary outcome in the  
161 published article. If a primary outcome was not explicitly described, we considered  
162 the outcomes reported in the sample size estimation. When a primary outcome was  
163 not explicitly specified in the article or sample size calculation the paper was  
164 classified as “not reporting a primary outcome”. We recorded whether the primary  
165 outcome was retrieved from the power calculation or from a proper sentence.

166 *Power calculation*- Authors reported a power calculation that was performed *a*  
167 *priori* to estimate the sample size. Power calculations performed after completion of  
168 the study were not considered.

169 *Random sequence generation*- Authors explicitly described the methods and  
170 the type of randomisation to generate the random list. Two features were required to  
171 be listed as “yes” [11]: (1) Explanation of the method by which the random sequence  
172 was generated (i.e., computer, coin tosses, etc). A statement that a statistician

173 performed the sequence generation was also valid. (2) Explanation of the type of  
174 randomisation, e.g., simple randomisation, permuted block (to avoid imbalances in  
175 allocation), stratification (to balance the distribution of certain baseline risk factors),  
176 or a combination of these techniques.

177 *Allocation concealment-* The methods used to prevent the individuals  
178 enrolling trial participants from knowing or predicting the allocation sequence in  
179 advance (i.e., the method of preventing study personnel from having awareness of  
180 treatment assignment before enrolling; [11]), were described in the article. Acceptable  
181 methods, among others, are: Central, Pharmacy, Opaque sealed envelopes, etc.

182 *Blinding-* Definitions such as single, double or triple-blinding were not  
183 considered sufficient to explain who was blinded and to what [2,12].

184 *Blinding of participants-* The article explicitly described that  
185 participants were unaware of participants' group allocation. Blinding of  
186 participants in medical articles referred to blinding of patients. Blinding of  
187 participants in veterinary articles referred to blinding the owners of the  
188 animals.

189 *Blinding of personnel-* The article explicitly describes that operators  
190 involved in the care of participants were unaware of participants' group of  
191 allocation.

192 *Blinding of outcome assessors-* The article explicitly describes that  
193 outcome assessors were unaware of participants' group of allocation.

194 *Intention-to-treat-* The article explicitly mentions that the analysis was made  
195 on an "intention-to-treat" basis.



196 *Effect size estimation methods*- Results (in particular for differences between  
197 groups) are provided with methods that estimate the effect size (i.e., risk ratio, odds  
198 ratio, mean difference, etc.) with confidence interval, rather than solely “p values”.

199

200 For the purpose of the analyses, the domains “primary outcome”, “power  
201 calculation”, “random sequence generation”, “allocation concealment”, and “use of  
202 estimation methods” were considered always feasible, while the domains “blinding of  
203 participants”, “blinding of personnel”, “blinding of outcome assessors” and  
204 “intention-to-treat” were considered occasionally feasible, depending on study  
205 characteristics.

206

207 *Additional data extracted for each article*

208 The following information was extracted from each article: Volume, Issue,  
209 Title, Nationality of the affiliation of the first author, Objective or hypothesis of the  
210 study.

211

212 *Additional data extracted for each RCT*

213 The following information was extracted from each RCT:

214 *Number of participants* - The total number of participants of each RCT was  
215 extrapolated. If more than one RCT with the same treatments were described in the  
216 same article, the total number of patients randomised was used. If the RCTs had  
217 different treatments (i.e., one placebo-controlled, and one active-controlled) the  
218 number of patients randomised in the placebo controlled RCT was employed. If a  
219 RCT and a non-randomised study were described in the same article, only the number  
220 of patients randomised was used.

221            *Main publication of the RCT*- We purposely included both first publications  
222 relating to particular trials than secondary publications of trials (i.e., study reporting  
223 subgroup analysis, cost-effectiveness analysis, long-term outcomes), prompt that the  
224 randomisation was still active. For further analyses such RCTs were classified as  
225 “secondary publications”, while articles reporting the first results of a trial were  
226 classified as “primary publications”.

227            *Associated with non-randomised material*- RCTs were categorized as  
228 “standalone” or “supplemented” based upon the presence of additional non-  
229 randomised articles (i.e., in vitro or prospective data) reported in the same article of  
230 the RCT.

231            *Self-defined as RCT*- Initially, we purposely used a broad definition of RCT  
232 (i.e., trials in which interventions are randomly allocated) to avoid underestimation of  
233 the proportion of randomised trials due to poor terminology reporting (i.e.,  
234 investigators randomly allocate interventions but ignore the terminology “randomised  
235 controlled trial”). By the other side, the lack of explicit delineation of a randomised  
236 trial as “RCT” can be associated to a lack of reconnaissance as “RCT” by the  
237 investigators, and therefore to poorer reporting and higher risk of certain bias.  
238 Therefore, we further classified the randomised trials to account for the explicitly self-  
239 recognisant RCT (called “manifest RCT” in this piece of work) and for the others,  
240 randomised trials that did not recognise themselves as RCT (called “unstated RCT” in  
241 this piece of work). All the randomised trials that were registered in a trial repository  
242 were automatically included in the “manifest RCT” category. Trials not registered,  
243 needed to report the typical design terminology “randomised” (or “randomised”),  
244 “controlled” (or “clinical”), “trial” (or “study”) somewhere in the main article to be  
245 classified as a “manifest RCT”. This terminology did not have to be reported in a

246 specific section of the article. The old definition of “randomised field trial” was also  
247 considered acceptable. Randomised trials that were not registered in a trial repository  
248 and did not use this terminology somewhere in the article were categorised as  
249 “unstated RCT”. A sub-category based on type and self-reconnaissance as RCT is:  
250 “parallel manifest RCT”, which is created to encompass all the randomised trial that  
251 have the more classical design (parallel) and that are aware of being RCT.

## 252 **References**

- 253 1. Kirkwood, B. R., Sterne, J. A. Essential medical statistics. Oxford: Blackwell  
254 Science Ltd; 2003.
- 255 2. Giuffrida, M. A., Agnello, K. A., & Brown, D. C. Blinding terminology used in  
256 reports of randomized controlled trials involving dogs and cats. *J Am Vet Med Assoc.*  
257 **241**, 1221-1226 (2012).
- 258 3. Sjögren, P., & Halling, A. Randomised controlled trials and publication trends in  
259 periodontal research during 1980-2000. *J Clin Periodontol.* **29**, 1112-7 (2002).
- 260 4. Momeni, A., Becker, A., Antes, G., Diener, M. K., Blümle, A., & Stark, G. B.  
261 Evidence-based plastic surgery: controlled trials in three plastic surgical journals  
262 (1990-2005). *Ann Plast Surg.* **61**, 221-225 (2008).
- 263 5. Farlex Medical Dictionary. Definition: Intervention. Available: [http://medical-](http://medical-dictionary.thefreedictionary.com/intervention)  
264 [dictionary.thefreedictionary.com/intervention](http://medical-dictionary.thefreedictionary.com/intervention), accessed on June 5 2014.
- 265 6. Merriam-Webster Encyclopaedia Britannica. Definition: Intervention. Available:  
266 <http://www.merriam-webster.com/medical/intervention>, accessed on June 5 2014.
- 267 7. McCulloch, P. No surgical innovation without evaluation: the IDEAL  
268 recommendations. *Lancet.* **374**, 1105-1112. (2009).
- 269 8. Glossary of Cochrane terms. Available: <http://community.cochrane.org/glossary>,  
270 accessed on March 6 2015.

- 271 9. Schulz, K. F., Chalmers, I., Grimes, D. A., & Altman, D. G. Assessing the quality  
272 of randomization from reports of controlled trials published in obstetrics and  
273 gynecology journals. *JAMA*. **272**, 125-8 (1994).
- 274 10. Chan AW, Altman DG. Epidemiology and reporting of randomised trials  
275 published in PubMed journals. *Lancet*. 2005;365(9465):1159-62.
- 276 11. Moher, D., et al. CONSORT 2010 Explanation and Elaboration: Updated  
277 guidelines for reporting parallel group randomised trials. *J Clin Epidemiol*. **63**, e1-37  
278 (2010).
- 279 12. Haahr MT, Hróbjartsson A. Who is blinded in randomized clinical trials? A study  
280 of 200 trials and a survey of authors. *Clin Trials*. 2006;3(4):360-5.

281

## 282 **Supplementary Data**

### 283 ***Other characteristics of RCTs evaluated***

284 Less than a half (41.2%; 47/114) of the veterinary randomized trials were  
285 classified as “explicit RCTs”, while all RCTs in general medicine were categorised as  
286 “explicit RCT” (100%; 60/60). The vast majority of the medical RCTs (85%; 51/60)  
287 were categorised as “parallel explicit RCTs” (i.e., parallel RCTs using the RCT  
288 terminology), while only one third of the veterinary RCTs (35.1%; 40/114) were  
289 categorised as such.

290 Some veterinary articles (10.5%; 12/114) had additional in vitro or other non-  
291 randomized evidence included in the same publication of the RCT. None of the  
292 medical RCTs presented accompanying non-randomized evidence in the same article.

293 One article in veterinary medicine (0.9%; 1/114) was identified as a secondary  
294 publication of a previously published RCT, while 13.3% of the medical articles (8/60)  
295 were secondary publications of trials.

296

297 **Supplementary Table S1**

298 Binary logistic regression outcome. Association between journal and prevalence of  
299 RCTs. In this analysis the ORs represent the odds of publishing EoI studies with a  
300 randomized controlled design, compared with JAVMA. Medical journals had from 6  
301 to 15 times the odds of publishing a RCT compared with one of the veterinary  
302 journals.

303

|           |         | 95% CI for ORs |       |        |         |
|-----------|---------|----------------|-------|--------|---------|
|           |         | ORs            | Lower | Upper  | P value |
| Indicator | JAVMA   |                |       |        |         |
|           | Lancet  | 15.400         | 6.441 | 36.818 | .000    |
|           | NEJM    | 15.060         | 6.777 | 33.466 | .000    |
|           | JAMA    | 11.183         | 4.632 | 27.001 | .000    |
|           | BMJ     | 7.537          | 2.981 | 19.057 | .000    |
|           | AJVR    | 6.926          | 2.726 | 17.599 | .000    |
|           | Annals  | 6.286          | 2.269 | 17.417 | .000    |
|           | Vet J   | 1.897          | .880  | 4.089  | .103    |
|           | Vet Rec | 1.833          | .702  | 4.786  | .216    |
|           | JVIM    | 1.659          | .712  | 3.864  | .241    |

304

305

306
